# Supplementary material
Source: ML conference proceedings conference paper supplement (https://openreview.net/forum?id=xx3qRKvG0T)
Supplement: supplementary_material [file attachment]

382 **Appendix**

383 **A Additional Experiments<sup>3</sup>**

384 **A.1 Experiments on the ETT datasets**

385 In the main body, we present a comparison of the benchmark methods on the ETTm2 dataset. In this  
 386 section, we extend our analysis to the remaining three ETT datasets, namely ETTh1, ETTh2, and  
 387 ETTm1, as summarized in Table 7. Our experimental results reveal that Basisformer outperforms all  
 388 other methods in terms of MSE and MAE. Specifically, Basisformer demonstrates a superior average  
 389 MSE reduction of 1.32% , 6.74% and 9.23% when compared to FiLM, Fedformer and DLinear,  
 390 respectively.

Table 7: Multivariate results for the remaining three ETT datasets using an input length of  $I = 96$  (or  $I = 36$  for the illness dataset) and output lengths of  $O \in \{96, 192, 336, 720\}$  (or  $O \in \{24, 36, 48, 60\}$  for the illness dataset). In all experiments, lower MSE values indicate better model performance, and we present the best results in boldface.

| Models | Fedformer |              | Autoformer |       | N-HiTS |              | FiLM         |              | Dlinear      |       | Informer     |       | Basisformer |              |              |
|--------|-----------|--------------|------------|-------|--------|--------------|--------------|--------------|--------------|-------|--------------|-------|-------------|--------------|--------------|
| Metric | MSE       | MAE          | MSE        | MAE   | MSE    | MAE          | MSE          | MAE          | MSE          | MAE   | MSE          | MAE   | MSE         | MAE          |              |
| ETTh1  | 96        | <b>0.376</b> | 0.419      | 0.449 | 0.459  | 0.419        | 0.413        | 0.388        | 0.401        | 0.386 | <b>0.400</b> | 0.865 | 0.713       | 0.394        | 0.411        |
|        | 192       | <b>0.420</b> | 0.448      | 0.500 | 0.482  | 0.468        | 0.443        | 0.443        | 0.439        | 0.437 | <b>0.432</b> | 1.008 | 0.792       | 0.442        | 0.437        |
|        | 336       | <b>0.459</b> | 0.465      | 0.521 | 0.496  | 0.551        | 0.489        | 0.484        | 0.461        | 0.481 | 0.459        | 1.107 | 0.809       | 0.473        | <b>0.451</b> |
|        | 720       | 0.506        | 0.507      | 0.514 | 0.512  | 0.669        | 0.559        | 0.525        | 0.519        | 0.519 | 0.516        | 1.181 | 0.865       | <b>0.460</b> | <b>0.465</b> |
| ETTh2  | 96        | 0.358        | 0.397      | 0.346 | 0.388  | 0.374        | 0.383        | <b>0.292</b> | <b>0.341</b> | 0.333 | 0.387        | 3.755 | 1.525       | 0.312        | 0.356        |
|        | 192       | 0.429        | 0.439      | 0.456 | 0.452  | 0.476        | 0.446        | <b>0.378</b> | <b>0.396</b> | 0.477 | 0.476        | 5.602 | 1.931       | 0.382        | 0.401        |
|        | 336       | 0.496        | 0.487      | 0.482 | 0.486  | 0.472        | 0.446        | 0.426        | 0.438        | 0.594 | 0.541        | 4.721 | 1.835       | <b>0.418</b> | <b>0.431</b> |
|        | 720       | 0.463        | 0.474      | 0.515 | 0.511  | 0.932        | 0.636        | 0.443        | 0.455        | 0.831 | 0.657        | 3.647 | 1.625       | <b>0.418</b> | <b>0.438</b> |
| ETTh1  | 96        | 0.379        | 0.419      | 0.505 | 0.475  | <b>0.324</b> | <b>0.349</b> | 0.357        | 0.373        | 0.345 | 0.372        | 0.672 | 0.571       | 0.342        | 0.374        |
|        | 192       | 0.426        | 0.441      | 0.553 | 0.496  | <b>0.376</b> | <b>0.379</b> | 0.387        | 0.385        | 0.380 | 0.389        | 0.795 | 0.669       | 0.380        | 0.392        |
|        | 336       | 0.445        | 0.459      | 0.621 | 0.537  | <b>0.409</b> | <b>0.405</b> | 0.420        | 0.407        | 0.413 | 0.413        | 1.212 | 0.871       | 0.420        | 0.418        |
|        | 720       | 0.543        | 0.490      | 0.671 | 0.561  | <b>0.472</b> | 0.443        | 0.478        | <b>0.439</b> | 0.474 | 0.453        | 1.166 | 0.823       | 0.492        | 0.458        |

391 **A.2 Experimental results with longer length input setting**

392 Throughout our research, we maintain consistency in our experimental settings by fixing the input  
 393 length to be 96 (with a reduced input length of 36 for the illness dataset), instead of using a longer  
 394 length. The main rationale behind this decision is that, in practical scenarios where the model is  
 395 deployed as an online service and tasked with predicting a long range of the future at a granular level  
 396 of minutes or hours, collecting a lengthy history (i.e., spanning 720 timestamps) for a large number  
 397 of time series in real-time can be quite challenging. Therefore, the adoption of an input length of 96  
 398 proves to be more practical and feasible.

399 Given that certain recent methods utilize longer input lengths to yield better performance, irrespective  
 400 of the length, we present supplementary comparison outcomes with extended input lengths in Table  
 401 8. Specifically, Fedformer, Autoformer, and TCN exhibit a decline in performance with an increase  
 402 in input length, and hence, we retain their original outcomes at an input length of 96. In contrast,  
 403 Dlinear employs an input length of 336 (104 for the illness dataset) by default, FiLM utilizes an input  
 404 length that is at most four times of the output length, and N-HiTS adopts an input length that is five  
 405 times of the output length. To enable a fair comparison, we standardize our input length for longer  
 406 inputs to 192 (72 for the illness dataset).

407 The experimental results yield several notable findings. Firstly, those methods that benefit from  
 408 longer inputs, namely Dlinear, FiLM, and N-HiTS, exhibit a significant performance decline when  
 409 the input length is reduced from longer settings to an input length of 96. Concretely, Dlinear, FiLM,  
 410 and N-HiTS show performance declines of 25.82%, 19.48%, and 330.42%, respectively. Conversely,  
 411 our approach maintains most of its performance with a slight deterioration of 6.23%, as evident in  
 412 Table 1 and Table 8. Secondly, concerning longer inputs, our method surpasses recent approaches  
 413 such as Dlinear, FiLM, and N-HiTS, with an average MSE performance improvement of 1.35%,  
 414 0.63%, and 7.75%, respectively, and a corresponding evaluation MAE performance improvement of  
 415 3.15%, 2.33%, and 4.06%, respectively. It is noteworthy that our approach requires an input length

<sup>3</sup>All the six datasets can be downloaded from [https://drive.google.com/drive/folders/1Z0YpTUa82\\_jCcXIdTmyr0LXQfvaM9vIy?usp=sharing](https://drive.google.com/drive/folders/1Z0YpTUa82_jCcXIdTmyr0LXQfvaM9vIy?usp=sharing)

Table 8: Multivariate results for six datasets using a longer input length. Lower MSE indicate superior model performance, and the best results are presented in boldface.

| Models      |     | Fedformer |       | Autoformer |       | N-HiTS       |              | FiLM         |              | Dlinear      |              | TCN   |       | Basisformer  |              |
|-------------|-----|-----------|-------|------------|-------|--------------|--------------|--------------|--------------|--------------|--------------|-------|-------|--------------|--------------|
| Metric      |     | MSE       | MAE   | MSE        | MAE   | MSE          | MAE          | MSE          | MAE          | MSE          | MAE          | MSE   | MAE   | MSE          | MAE          |
| ETT         | 96  | 0.203     | 0.287 | 0.255      | 0.339 | 0.176        | <b>0.255</b> | <b>0.165</b> | 0.256        | 0.167        | 0.260        | 3.041 | 1.330 | 0.185        | 0.270        |
|             | 192 | 0.269     | 0.328 | 0.281      | 0.340 | 0.245        | 0.305        | <b>0.222</b> | <b>0.296</b> | 0.224        | 0.303        | 3.072 | 1.339 | 0.247        | 0.307        |
|             | 336 | 0.325     | 0.366 | 0.339      | 0.372 | 0.295        | 0.346        | <b>0.277</b> | <b>0.333</b> | 0.281        | 0.342        | 3.105 | 1.348 | 0.298        | 0.341        |
|             | 720 | 0.421     | 0.415 | 0.422      | 0.419 | 0.401        | 0.416        | <b>0.371</b> | <b>0.389</b> | 0.397        | 0.421        | 3.135 | 1.354 | 0.381        | 0.393        |
| electricity | 96  | 0.193     | 0.308 | 0.201      | 0.317 | 0.147        | 0.249        | 0.154        | 0.267        | <b>0.140</b> | <b>0.237</b> | 0.985 | 0.813 | 0.145        | 0.245        |
|             | 192 | 0.201     | 0.315 | 0.222      | 0.334 | 0.167        | 0.269        | 0.164        | 0.258        | <b>0.153</b> | <b>0.249</b> | 0.996 | 0.821 | 0.165        | 0.263        |
|             | 336 | 0.214     | 0.329 | 0.231      | 0.338 | 0.186        | 0.290        | 0.188        | 0.283        | <b>0.169</b> | <b>0.267</b> | 1.000 | 0.824 | 0.178        | 0.276        |
|             | 720 | 0.246     | 0.355 | 0.254      | 0.361 | 0.243        | 0.340        | 0.236        | 0.332        | <b>0.203</b> | <b>0.301</b> | 1.438 | 0.784 | 0.219        | 0.310        |
| exchange    | 96  | 0.148     | 0.278 | 0.197      | 0.323 | 0.092        | 0.211        | <b>0.079</b> | 0.204        | 0.081        | <b>0.203</b> | 3.004 | 1.432 | 0.084        | 0.205        |
|             | 192 | 0.271     | 0.380 | 0.300      | 0.369 | 0.208        | 0.322        | 0.159        | <b>0.292</b> | <b>0.157</b> | 0.293        | 3.048 | 1.444 | 0.172        | 0.298        |
|             | 336 | 0.460     | 0.500 | 0.509      | 0.524 | 0.341        | 0.422        | <b>0.270</b> | <b>0.398</b> | 0.305        | 0.414        | 3.113 | 1.459 | 0.303        | 0.403        |
|             | 720 | 1.195     | 0.841 | 1.447      | 0.941 | 0.888        | 0.723        | <b>0.536</b> | <b>0.574</b> | 0.643        | 0.601        | 3.150 | 1.458 | 0.781        | 0.668        |
| traffic     | 96  | 0.587     | 0.366 | 0.613      | 0.388 | <b>0.402</b> | <b>0.282</b> | 0.416        | 0.294        | 0.410        | 0.282        | 1.438 | 0.784 | 0.403        | 0.293        |
|             | 192 | 0.604     | 0.373 | 0.616      | 0.382 | 0.420        | 0.297        | <b>0.408</b> | <b>0.288</b> | 0.423        | 0.287        | 1.463 | 0.794 | 0.421        | 0.301        |
|             | 336 | 0.621     | 0.383 | 0.622      | 0.387 | 0.448        | 0.313        | 0.425        | 0.298        | 0.436        | <b>0.296</b> | 1.479 | 0.799 | <b>0.418</b> | 0.298        |
|             | 720 | 0.626     | 0.382 | 0.660      | 0.408 | 0.539        | 0.353        | 0.520        | 0.353        | 0.466        | 0.315        | 1.499 | 0.804 | <b>0.464</b> | <b>0.312</b> |
| weather     | 96  | 0.217     | 0.296 | 0.266      | 0.336 | <b>0.158</b> | <b>0.195</b> | 0.199        | 0.262        | 0.176        | 0.237        | 0.615 | 0.589 | 0.168        | 0.215        |
|             | 192 | 0.276     | 0.336 | 0.307      | 0.367 | <b>0.211</b> | <b>0.247</b> | 0.228        | 0.288        | 0.220        | 0.282        | 0.629 | 0.600 | 0.213        | 0.257        |
|             | 336 | 0.339     | 0.380 | 0.359      | 0.395 | 0.274        | 0.300        | 0.267        | 0.323        | 0.265        | 0.319        | 0.639 | 0.608 | <b>0.263</b> | <b>0.292</b> |
|             | 720 | 0.403     | 0.428 | 0.419      | 0.428 | 0.351        | 0.353        | <b>0.319</b> | 0.361        | 0.323        | 0.362        | 0.639 | 0.610 | 0.343        | <b>0.346</b> |
| illness     | 24  | 3.228     | 1.260 | 3.486      | 1.287 | 1.862        | 0.869        | 1.970        | 0.875        | 2.215        | 1.081        | 6.624 | 1.830 | <b>1.427</b> | <b>0.778</b> |
|             | 36  | 2.679     | 1.080 | 3.103      | 1.148 | 2.071        | 0.969        | 1.982        | 0.859        | 1.936        | 0.963        | 6.858 | 1.879 | <b>1.464</b> | <b>0.813</b> |
|             | 48  | 2.622     | 1.078 | 2.669      | 1.085 | 2.184        | 0.999        | 1.868        | 0.896        | 2.130        | 1.024        | 6.968 | 1.892 | <b>1.660</b> | <b>0.862</b> |
|             | 60  | 2.857     | 1.157 | 2.770      | 1.125 | 2.507        | 1.060        | 2.057        | 0.929        | 2.368        | 1.096        | 7.127 | 1.918 | <b>1.853</b> | <b>0.917</b> |

of 192 (72 for the illness dataset), which is at least 40% lower than the input length of the other three methods. Furthermore, for even longer input lengths, our model’s performance can be further enhanced, signifying that our approach can leverage limited data more efficiently.

### A.3 Additional ablation study

**Impact of the number of basis vectors:** We present the performance of the proposed model under varying numbers of basis vectors  $N$  in Table 9, where  $N$  is set to 1, 5, 10, 15, and 20. The results demonstrate that the model’s performance remains stable over a wide range of  $N$ , indicating its ability to adaptively adjust to the number of basis vectors. Notably, when  $N$  increases beyond a certain threshold, some of the basis vectors may become redundant. To further explore this, we visualize a subset of the learned basis vectors when  $N = 20$  in Figure 3. Interestingly, we observe a high cosine similarity of  $-0.93$  between two of the bases, suggesting that some basis vectors may not be necessary for accurate prediction. Thus, in practical applications, we set  $N$  to 10 for all datasets to reduce computational complexity without compromising performance.

Table 9: The impact of the number of bases  $N$  on the performance of the model. The electricity dataset is employed in this experiment. We present the best results in boldface.

| basis number | 1     |       | 5     |       | 10           |              | 15    |       | 20    |              |
|--------------|-------|-------|-------|-------|--------------|--------------|-------|-------|-------|--------------|
| Metric       | MSE   | MAE   | MSE   | MAE   | MSE          | MAE          | MSE   | MAE   | MSE   | MAE          |
| 96           | 0.173 | 0.269 | 0.171 | 0.265 | <b>0.166</b> | <b>0.259</b> | 0.168 | 0.263 | 0.168 | 0.263        |
| 192          | 0.183 | 0.277 | 0.178 | 0.270 | <b>0.176</b> | 0.270        | 0.176 | 0.269 | 0.176 | <b>0.268</b> |
| 336          | 0.196 | 0.289 | 0.192 | 0.284 | <b>0.190</b> | <b>0.283</b> | 0.192 | 0.285 | 0.193 | 0.285        |
| 720          | 0.231 | 0.317 | 0.229 | 0.314 | <b>0.218</b> | <b>0.306</b> | 0.220 | 0.308 | 0.224 | 0.311        |
| avg          | 0.196 | 0.288 | 0.192 | 0.283 | <b>0.187</b> | <b>0.279</b> | 0.189 | 0.281 | 0.190 | 0.282        |

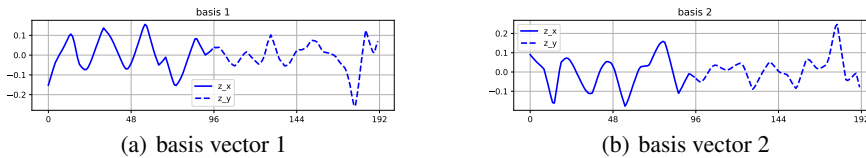

Figure 3: Two highly correlated basis vectors when the number of basis vectors  $N$  is large.

429 **Impact of the number of the BCAB layers:** The ablation study on the number of BCABs is shown  
 430 in Table 10. The findings indicate that stacking a certain number of BCAB modules can enhance the  
 431 performance of the model. However, exceeding a certain threshold can lead to overfitting, resulting  
 432 in a decline in performance. Hence, we recommend the use of two layers of BCABs in practical  
 433 experiments to achieve optimal performance without overfitting the model.

Table 10: The impact of the number of stacked BCAB on the performance of the model. The electricity dataset is employed in this experiment. We present the best results in boldface.

| BCAB number | 1            |              | 2            |              | 3     |       | 4     |       |
|-------------|--------------|--------------|--------------|--------------|-------|-------|-------|-------|
| Metric      | MSE          | MAE          | MSE          | MAE          | MSE   | MAE   | MSE   | MAE   |
| 96          | 0.166        | 0.260        | <b>0.166</b> | <b>0.259</b> | 0.168 | 0.263 | 0.171 | 0.266 |
| 192         | 0.176        | 0.270        | <b>0.176</b> | <b>0.268</b> | 0.176 | 0.269 | 0.179 | 0.272 |
| 336         | <b>0.187</b> | <b>0.280</b> | 0.190        | 0.283        | 0.190 | 0.283 | 0.191 | 0.284 |
| 720         | 0.228        | 0.313        | <b>0.218</b> | <b>0.306</b> | 0.234 | 0.319 | 0.237 | 0.319 |
| avg         | 0.189        | 0.281        | <b>0.187</b> | <b>0.279</b> | 0.192 | 0.283 | 0.194 | 0.285 |

434 **Impact of the bottleneck in the forecast module:** The performance of the proposed model under  
 435 varying bottleneck settings is presented in Table 11. The results demonstrate that employing a  
 436 bottleneck architecture with a width of 48 can significantly reduce the number of model parameters  
 437 without degrading the performance significantly, as opposed to not using a bottleneck architecture.

Table 11: The impact of the MLP bottleneck in the forecast module. The electricity dataset is employed in this experiment. Setting the bottleneck dimension to 96 is equivalent to not using a bottleneck since the input length is 96. The best results are highlighted in bold. The second best is underlined.

| bottleneck | 96           |              | 48           |              | 32    |       | 24    |       |
|------------|--------------|--------------|--------------|--------------|-------|-------|-------|-------|
| Metric     | MSE          | MAE          | MSE          | MAE          | MSE   | MAE   | MSE   | MAE   |
| 96         | <b>0.163</b> | <b>0.257</b> | <u>0.166</u> | <u>0.259</u> | 0.172 | 0.267 | 0.172 | 0.269 |
| 192        | <b>0.172</b> | <b>0.265</b> | <u>0.176</u> | <u>0.268</u> | 0.182 | 0.273 | 0.186 | 0.279 |
| 336        | <b>0.186</b> | <b>0.279</b> | <u>0.190</u> | <u>0.283</u> | 0.194 | 0.286 | 0.197 | 0.289 |
| 720        | <b>0.217</b> | <b>0.305</b> | <u>0.218</u> | <u>0.306</u> | 0.230 | 0.316 | 0.233 | 0.317 |
| avg        | <b>0.184</b> | <b>0.276</b> | <u>0.187</u> | <u>0.279</u> | 0.195 | 0.286 | 0.197 | 0.288 |

#### 438 A.4 Sensitivity analysis of the weights for the losses in Eq.(9)

439 Our model utilizes three distinct loss functions: the supervised MSE loss for prediction  $L_{pred}$ , the  
 440 self-supervised InfoNCE loss for basis learning  $L_{align}$ , and the smoothness loss for smoothing the  
 441 basis over time  $L_{align}$ . During training, we directly combine these loss functions as the model’s  
 442 performance is not significantly impacted by the relative weights of the individual losses within  
 443 a certain range. This assertion is supported by the performance evaluation presented in Figure 4,  
 444 which investigates the impact of different weight combinations of the three loss functions. In our  
 445 setting, we fix the weight of the predicted loss function to be 1, and then fix either the weight of the  
 446 contrast loss function or the smoothness loss function to be 1, while the other one varies within the  
 447 range of  $\{0.2, 0.4, 0.6, 0.8, 1.0, 1.2, 1.4, 1.6\}$ . To explore the inflection point of the effect, we take  
 448 the middle point of two points and calculate a finer range again. Our results indicate that the contrast  
 449 loss function is essentially stable between the weight range of 0.6-1.2, while the smoothness loss  
 450 function is similarly stable between the weight range of 0.9-1.5.

#### 451 A.5 Uncertainty of the results

452 To assess the stability of our proposed method, we performed 5 repeated experiments and calculated  
 453 the standard deviations for all methods, as presented in Table 12. Notably, our method exhibits a  
 454 relatively small variance within the table, indicating its high degree of stability.

## 455 B Implementation Details

456 The training and testing of BasisFormer are conducted on an NVIDIA GeForce RTX 3090 graphics  
 457 card with 24268MB of VRAM. During the trainin process, we adopt the Adabelief optimizer [23] for

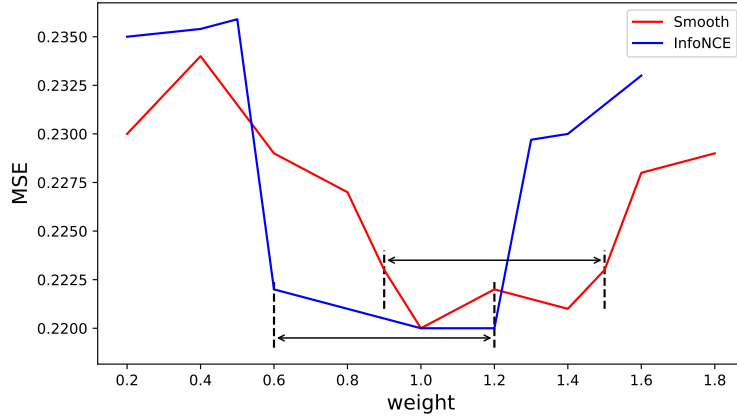

Figure 4: MSE for the testing data as a function of the weight for the smoothness (the red line) and the infoNCE loss(the blue line).

Table 12: Results for 6 benchmark datasets with standard deviations in the brackets.

| Models      |     | Fedformer        |                  | Autoformer       |                  | N-HiTS           |                  | FiLM                    |                         | Dlinear                 |                  | TCN              |                  | Basisformer             |                         |
|-------------|-----|------------------|------------------|------------------|------------------|------------------|------------------|-------------------------|-------------------------|-------------------------|------------------|------------------|------------------|-------------------------|-------------------------|
| Metric      |     | MSE              | MAE              | MSE              | MAE              | MSE              | MAE              | MSE                     | MAE                     | MSE                     | MAE              | MSE              | MAE              | MSE                     | MAE                     |
| ETT         | 96  | 0.203<br>(0.002) | 0.287<br>(0.001) | 0.255<br>(0.020) | 0.339<br>(0.020) | 0.192<br>(0.003) | 0.265<br>(0.002) | <b>0.183</b><br>(0.000) | 0.266<br>(0.000)        | 0.193<br>(0.004)        | 0.292<br>(0.006) | 3.041<br>(0.000) | 1.330<br>(0.000) | 0.184<br>(0.002)        | <b>0.266</b><br>(0.002) |
|             | 192 | 0.269<br>(0.006) | 0.328<br>(0.005) | 0.281<br>(0.027) | 0.340<br>(0.025) | 0.287<br>(0.004) | 0.329<br>(0.001) | <b>0.247</b><br>(0.000) | <b>0.305</b><br>(0.000) | 0.284<br>(0.016)        | 0.362<br>(0.016) | 3.072<br>(0.002) | 1.339<br>(0.001) | 0.248<br>(0.004)        | 0.307<br>(0.002)        |
|             | 336 | 0.325<br>(0.002) | 0.366<br>(0.003) | 0.339<br>(0.018) | 0.372<br>(0.015) | 0.389<br>(0.005) | 0.389<br>(0.003) | <b>0.309</b><br>(0.000) | <b>0.343</b><br>(0.000) | 0.369<br>(0.006)        | 0.554<br>(0.002) | 3.105<br>(0.005) | 1.348<br>(0.003) | 0.321<br>(0.005)        | 0.355<br>(0.004)        |
|             | 720 | 0.421<br>(0.018) | 0.415<br>(0.012) | 0.422<br>(0.015) | 0.419<br>(0.010) | 0.591<br>(0.011) | 0.491<br>(0.002) | <b>0.407</b><br>(0.001) | <b>0.399</b><br>(0.000) | 0.554<br>(0.037)        | 0.522<br>(0.026) | 3.135<br>(0.021) | 1.354<br>(0.005) | 0.410<br>(0.007)        | 0.404<br>(0.004)        |
| electricity | 96  | 0.193<br>(0.001) | 0.308<br>(0.001) | 0.201<br>(0.003) | 0.317<br>(0.004) | 1.748<br>(0.003) | 1.020<br>(0.001) | 0.199<br>(0.000)        | 0.276<br>(0.001)        | 0.199<br>(0.000)        | 0.284<br>(0.000) | 0.985<br>(0.006) | 0.813<br>(0.004) | <b>0.165</b><br>(0.001) | <b>0.259</b><br>(0.001) |
|             | 192 | 0.201<br>(0.005) | 0.315<br>(0.006) | 0.222<br>(0.003) | 0.334<br>(0.004) | 1.743<br>(0.008) | 1.018<br>(0.003) | 0.198<br>(0.000)        | 0.279<br>(0.001)        | 0.198<br>(0.000)        | 0.287<br>(0.000) | 0.996<br>(0.008) | 0.821<br>(0.007) | <b>0.178</b><br>(0.001) | <b>0.272</b><br>(0.001) |
|             | 336 | 0.214<br>(0.001) | 0.329<br>(0.002) | 0.231<br>(0.006) | 0.338<br>(0.004) | 1.677<br>(0.010) | 1.000<br>(0.003) | 0.217<br>(0.001)        | 0.301<br>(0.001)        | 0.210<br>(0.001)        | 0.302<br>(0.001) | 1.000<br>(0.004) | 0.824<br>(0.003) | <b>0.189</b><br>(0.001) | <b>0.282</b><br>(0.001) |
|             | 720 | 0.246<br>(0.003) | 0.355<br>(0.003) | 0.254<br>(0.007) | 0.361<br>(0.008) | -                | -                | 0.280<br>(0.000)        | 0.358<br>(0.000)        | 0.245<br>(0.000)        | 0.335<br>(0.000) | 1.438<br>(0.006) | 0.784<br>(0.003) | <b>0.223</b><br>(0.002) | <b>0.311</b><br>(0.001) |
| exchange    | 96  | 0.148<br>(0.004) | 0.278<br>(0.004) | 0.197<br>(0.019) | 0.323<br>(0.012) | 1.685<br>(0.042) | 1.049<br>(0.017) | <b>0.083</b><br>(0.003) | <b>0.201</b><br>(0.003) | 0.088<br>(0.004)        | 0.218<br>(0.005) | 3.004<br>(0.128) | 1.432<br>(0.070) | 0.085<br>(0.004)        | 0.205<br>(0.005)        |
|             | 192 | 0.271<br>(0.012) | 0.380<br>(0.010) | 0.300<br>(0.020) | 0.369<br>(0.016) | 1.658<br>(0.015) | 1.023<br>(0.006) | 0.179<br>(0.003)        | 0.300<br>(0.002)        | <b>0.176</b><br>(0.005) | 0.315<br>(0.006) | 3.048<br>(0.020) | 1.444<br>(0.008) | 0.177<br>(0.005)        | <b>0.299</b><br>(0.005) |
|             | 336 | 0.460<br>(0.009) | 0.500<br>(0.007) | 0.509<br>(0.041) | 0.524<br>(0.016) | 1.566<br>(0.037) | 0.988<br>(0.015) | 0.337<br>(0.005)        | <b>0.416</b><br>(0.003) | <b>0.313</b><br>(0.008) | 0.427<br>(0.006) | 3.113<br>(0.082) | 1.459<br>(0.021) | 0.336<br>(0.011)        | 0.421<br>(0.007)        |
|             | 720 | 1.195<br>(0.042) | 0.841<br>(0.017) | 1.447<br>(0.084) | 0.941<br>(0.028) | 1.809<br>(0.052) | 1.055<br>(0.018) | <b>0.642</b><br>(0.040) | <b>0.610</b><br>(0.029) | 0.839<br>(0.027)        | 0.695<br>(0.012) | 3.150<br>(0.237) | 1.458<br>(0.063) | 0.854<br>(0.024)        | 0.670<br>(0.011)        |
| traffic     | 96  | 0.587<br>(0.010) | 0.366<br>(0.008) | 0.613<br>(0.028) | 0.388<br>(0.012) | 2.138<br>(0.016) | 1.026<br>(0.006) | 0.652<br>(0.001)        | 0.395<br>(0.003)        | 0.650<br>(0.001)        | 0.396<br>(0.001) | 1.438<br>(0.001) | 0.784<br>(0.001) | <b>0.444</b><br>(0.003) | <b>0.315</b><br>(0.003) |
|             | 192 | 0.604<br>(0.012) | 0.373<br>(0.009) | 0.616<br>(0.042) | 0.382<br>(0.020) | 2.101<br>(0.015) | 1.015<br>(0.007) | 0.605<br>(0.001)        | 0.371<br>(0.003)        | 0.605<br>(0.002)        | 0.378<br>(0.001) | 1.463<br>(0.032) | 0.794<br>(0.010) | <b>0.460</b><br>(0.004) | <b>0.316</b><br>(0.002) |
|             | 336 | 0.621<br>(0.008) | 0.383<br>(0.008) | 0.622<br>(0.009) | 0.387<br>(0.003) | -                | -                | 0.615<br>(0.001)        | 0.372<br>(0.001)        | 0.612<br>(0.003)        | 0.382<br>(0.004) | 1.479<br>(0.003) | 0.799<br>(0.002) | <b>0.471</b><br>(0.005) | <b>0.317</b><br>(0.004) |
|             | 720 | 0.626<br>(0.004) | 0.382<br>(0.003) | 0.660<br>(0.025) | 0.408<br>(0.015) | -                | -                | 0.692<br>(0.000)        | 0.428<br>(0.000)        | 0.645<br>(0.001)        | 0.394<br>(0.001) | 1.499<br>(0.010) | 0.804<br>(0.005) | <b>0.486</b><br>(0.005) | <b>0.318</b><br>(0.004) |
| weather     | 96  | 0.217<br>(0.018) | 0.296<br>(0.019) | 0.266<br>(0.007) | 0.336<br>(0.006) | 0.648<br>(0.001) | 0.492<br>(0.000) | 0.193<br>(0.002)        | 0.234<br>(0.001)        | 0.196<br>(0.001)        | 0.255<br>(0.003) | 0.615<br>(0.002) | 0.589<br>(0.002) | <b>0.173</b><br>(0.003) | <b>0.214</b><br>(0.003) |
|             | 192 | 0.276<br>(0.015) | 0.336<br>(0.017) | 0.307<br>(0.024) | 0.367<br>(0.022) | 0.616<br>(0.003) | 0.479<br>(0.001) | 0.238<br>(0.000)        | 0.270<br>(0.001)        | 0.237<br>(0.001)        | 0.296<br>(0.002) | 0.629<br>(0.023) | 0.600<br>(0.009) | <b>0.223</b><br>(0.002) | <b>0.257</b><br>(0.001) |
|             | 336 | 0.339<br>(0.014) | 0.380<br>(0.015) | 0.359<br>(0.035) | 0.395<br>(0.031) | 0.579<br>(0.002) | 0.462<br>(0.001) | 0.288<br>(0.001)        | 0.304<br>(0.000)        | 0.283<br>(0.002)        | 0.335<br>(0.004) | 0.639<br>(0.050) | 0.608<br>(0.017) | <b>0.278</b><br>(0.001) | <b>0.298</b><br>(0.000) |
|             | 720 | 0.403<br>(0.009) | 0.428<br>(0.008) | 0.419<br>(0.017) | 0.428<br>(0.014) | 0.541<br>(0.001) | 0.447<br>(0.000) | 0.358<br>(0.001)        | 0.350<br>(0.000)        | 0.343<br>(0.020)        | 0.383<br>(0.020) | 0.639<br>(0.050) | 0.610<br>(0.018) | <b>0.355</b><br>(0.001) | <b>0.347</b><br>(0.001) |
| illness     | 24  | 3.228<br>(0.020) | 1.260<br>(0.009) | 3.486<br>(0.107) | 1.287<br>(0.018) | 3.297<br>(0.007) | 1.679<br>(0.000) | 2.198<br>(0.138)        | 0.911<br>(0.058)        | 2.398<br>(0.065)        | 1.040<br>(0.032) | 6.624<br>(0.550) | 1.830<br>(0.094) | <b>1.550</b><br>(0.087) | <b>0.814</b><br>(0.024) |
|             | 36  | 2.679<br>(0.018) | 1.080<br>(0.005) | 3.103<br>(0.139) | 1.148<br>(0.025) | 2.379<br>(0.136) | 1.441<br>(0.043) | 2.267<br>(0.077)        | 0.926<br>(0.059)        | 2.646<br>(0.137)        | 1.088<br>(0.064) | 6.858<br>(0.216) | 1.879<br>(0.034) | <b>1.516</b><br>(0.130) | <b>0.819</b><br>(0.030) |
|             | 48  | 2.622<br>(0.010) | 1.078<br>(0.002) | 2.669<br>(0.151) | 1.085<br>(0.037) | 3.341<br>(0.092) | 1.751<br>(0.030) | 2.348<br>(0.115)        | 0.989<br>(0.037)        | 2.614<br>(0.140)        | 1.086<br>(0.049) | 6.968<br>(0.032) | 1.892<br>(0.008) | <b>1.877</b><br>(0.110) | <b>0.907</b><br>(0.032) |
|             | 60  | 2.857<br>(0.011) | 1.157<br>(0.003) | 2.770<br>(0.085) | 1.125<br>(0.019) | 2.278<br>(0.187) | 1.493<br>(0.064) | 2.508<br>(0.130)        | 1.038<br>(0.018)        | 2.804<br>(0.049)        | 1.146<br>(0.009) | 7.127<br>(0.134) | 1.918<br>(0.025) | <b>1.878</b><br>(0.098) | <b>0.902</b><br>(0.024) |

Experiment with '-' means it reported an out-of-memory error on a computer with 128G memory.

Table 13: Comparison of computational complexity for different models.

| Methods     | TIME                              | MEMORY                            |
|-------------|-----------------------------------|-----------------------------------|
| Fedformer   | $\mathcal{O}(O)$                  | $\mathcal{O}(O)$                  |
| Autoformer  | $\mathcal{O}(O \log O)$           | $\mathcal{O}(O \log O)$           |
| N-HiTS      | $\mathcal{O}(O(1 - r^B)/(1 - r))$ | $\mathcal{O}(O(1 - r^B)/(1 - r))$ |
| FiLM        | $\mathcal{O}(O)$                  | $\mathcal{O}(O)$                  |
| Dlinear     | $\mathcal{O}(O)$                  | $\mathcal{O}(O)$                  |
| TCN         | $\mathcal{O}(O)$                  | $\mathcal{O}(O)$                  |
| LogTrans    | $\mathcal{O}(O \log O)$           | $\mathcal{O}(O^2)$                |
| Reformer    | $\mathcal{O}(O \log O)$           | $\mathcal{O}(O \log O)$           |
| Informer    | $\mathcal{O}(O \log O)$           | $\mathcal{O}(O \log O)$           |
| Basisformer | $\mathcal{O}(O)$                  | $\mathcal{O}(O)$                  |

458 optimization. We train the model for 30 epochs with the patience of 3 epochs. All experiments are  
 459 averaged over 5 trials.

460 To implement the multi-head mechanism, we calculate the multi-head attention for each CAB  
 461 separately, and then restore it to the original dimension through multiplication, concatenation, and a  
 462 linear layer. In the last layer of the network, a mapping layer was utilized to map it to  $H$  heads, and  
 463 the dot product outputs the final coefficients.

464 To promote the learning of bases and ensure consistency of time series across different dimensions,  
 465 we normalized the time series during training and performed inverse normalization when outputting  
 466 the results.

467 For the other models compared in the table, we utilized their original code and conducted experiments  
 468 by only varying the input length.

## 469 C Analysis of the Limitations of BasisFormer

470 BasisFormer demonstrates proficiency in learning effective representations and capturing the rela-  
 471 tionship between bases and time series. However, this proficiency is contingent upon the multi-  
 472 dimensional time series being on the same feature scale, which necessitates normalization of the  
 473 time series during training and inverse normalization when outputting results. Despite this, the  
 474 normalization and inverse normalization operations introduce changes to the original distribution of  
 475 the time series, making it arduous to fit certain distributions. As such, future work could explore  
 476 alternative approaches to training on datasets with considerably different feature scales, eliminating  
 477 the need for normalization and inverse normalization. Possible avenues for investigation include  
 478 identifying appropriate mathematical methods or neural network transformations to map data to a  
 479 suitable and universal feature space.

## 480 D Relation to Meta-learning

481 From a meta-learning standpoint, the learnable basis in our model is tantamount to meta-knowledge  
 482 for all time series within the same window. The coefficients, which are derived from the similarity  
 483 between each time series and the foundation, represent distinctive knowledge for each time series.  
 484 Consequently, our model can be perceived as a manifestation of meta-learning. Notwithstanding,  
 485 we departed from conventional meta-learning approaches by forgoing a two-stage inner-outer loop  
 486 optimization method, instead opting for an end-to-end training method.

## 487 E Analysis of the Model Complexity

488 Suppose that the input and output length in BasisFormer is  $I$  and  $O$  respectively when forecasting a  
 489 single time series. Note that the time and space complexity of BasisFormer are of the same order.  
 490 Therefore, we refer to both of them as complexity in the sequel.

491 With regards to the coef module, the complexity is primarily determined by the cross-attention  
 492 mechanism. Within our approach, BCAB utilizes attention on the channel dimension, and we

493 encode the time sequence dimension to a specified hidden length  $D_c \ll O$  via a linear layer during  
494 computation. Consequently, the complexity of this module is  $\mathcal{O}(N)$ , where  $N$  is the number of bases  
495 - a fixed hyperparameter which is usually not large. In this step, we omit the number of BCAB stacks  
496  $M$ , since  $M$  is also a fixed hyperparameter. As previously mentioned in Appendix A.3, to limit  
497 overfitting,  $M$  is typically set to 2.

498 The prediction module incorporates two Multilayer Perceptron (MLP) networks, which are employed  
499 for separating and concatenating different heads. Both MLP networks have bottlenecks with constant  
500 values, and they carry a complexity of  $\mathcal{O}(O)$ . In terms of the aggregation of different base vectors,  
501 the complexity also is  $\mathcal{O}(O)$ . Therefore, the cumulative complexity of this module is  $\mathcal{O}(O)$ .

502 In summary, the total complexity of our model is  $\mathcal{O}(O)$ . Table 13 provides a comparison of the  
503 computational complexity among different models, and BasisFormer achieves the lowest complexity  
504 among them.
